# Supplementary material
Source: PubMed Central journal article supplement (PMC7645976)

### **Supplementary Figure Legend**

#### **Supplementary Figure 1. Optimisation of detection antibodies for in vitro binding studies of PEGylated A1A2A3-VWF variants.**

**(A)** All A1A2A3 cysteine variants were equally detected using polyclonal sheep anti-VWF-A2 and anti-sheep HRP. **(B)** Following PEGylation within the A2-domain, this anti-A2 antibody displayed significantly reduced binding affinity for A2-PEGylated variants. **(C-D)** A polyclonal rabbit biotinylated anti-His tag antibody and strep-HRP were used to ensure equal detection of the A2-PEGylated variants (M1545C-PEG, L1591C-PEG and Q1652C-PEG).

**Supplementary Figure 2. PEGylation attenuates A1A2A3-VWF binding to GPIIb $\alpha$  in vitro.**

Binding of cysteine and PEGylated variants with extended half-lives to GPIIb $\alpha$  was assessed using immunosorbant assays in the presence of ristocetin. All data is graphed as mean values  $\pm$  SEM (\*  $p < 0.05$ , \*\*  $p < 0.01$ , \*\*\*  $p < 0.0001$  respectively).

**Supplementary Figure 3. Site-specific effects for A1A2A3-VWF PEGylation in modulating binding to collagens III and IV in vitro.**

**(A-C)** Binding of cysteine and PEGylated variants with extended half-lives to collagen type III and collagen type IV **(D-F)** was assessed using immunosorbant assays. All data is graphed as mean values  $\pm$  SEM (\*  $p < 0.05$ , \*\*  $p < 0.01$ , \*\*\*  $p < 0.0001$  respectively).

**Supplementary Figure 4. LRP1 mediates the binding of A1A2A3-VWF to differentiated THP-**

**1 macrophages in vitro. (A)** Expression of VWF clearance receptor LRP1 on differentiated THP-1 macrophages was confirmed by flow cytometry. **(B)** Inhibition of LRP1, with an anti-LRP1 antibody, significantly attenuated binding of WT-A1A2A3-VWF suggesting VWF adhesion occurs in LRP1-dependant manner.

**Supplementary Figure 1**

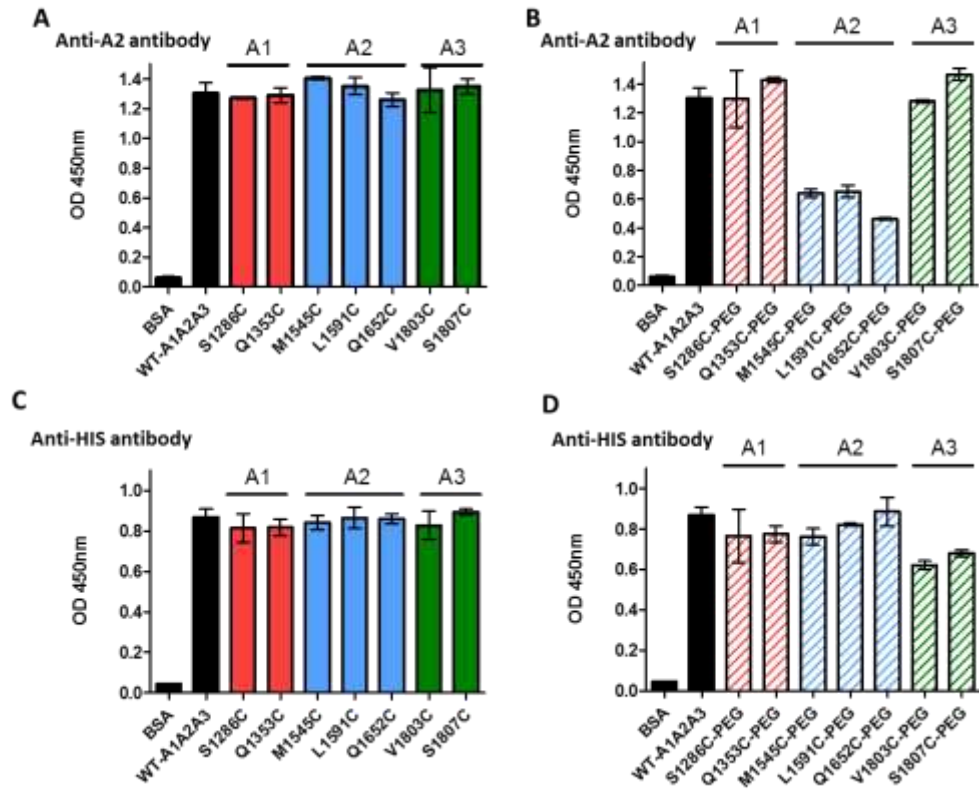

Supplementary Figure 2

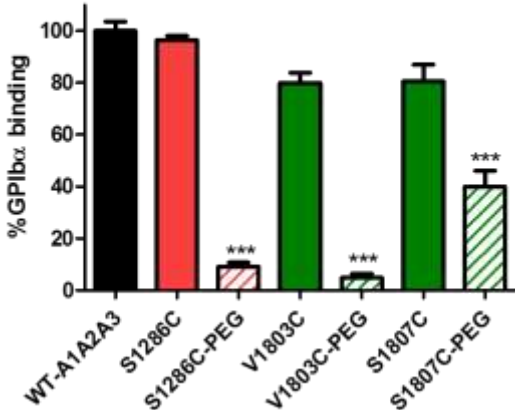

Supplementary Figure 3

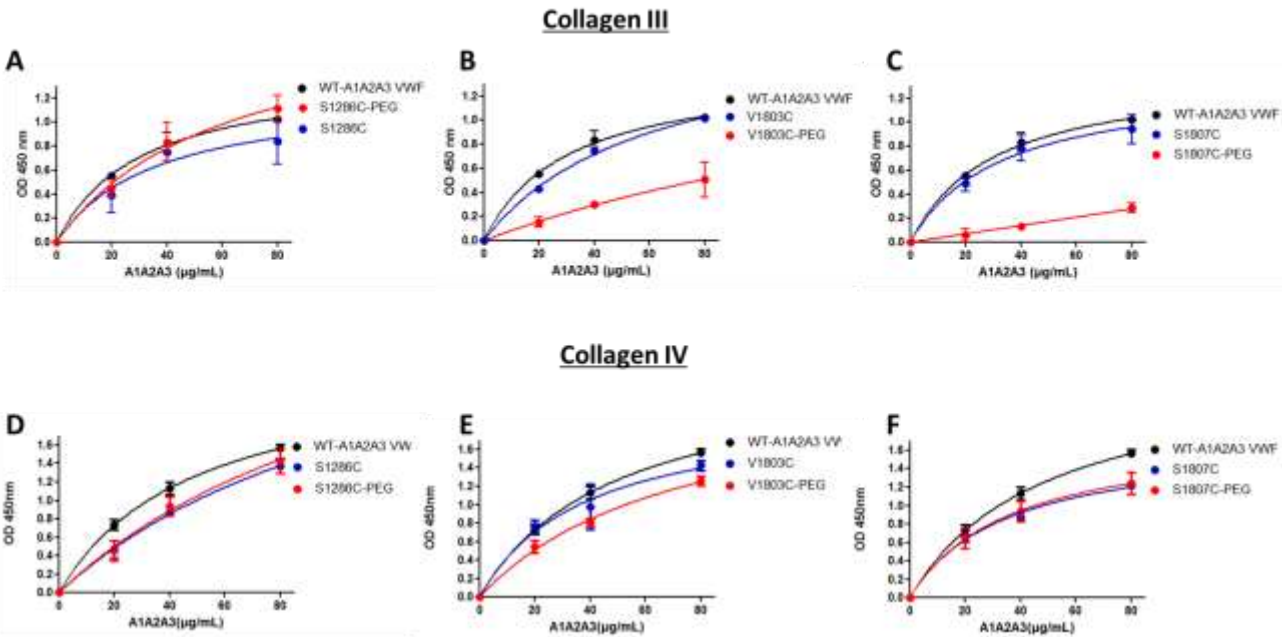

### Supplementary Figure 4

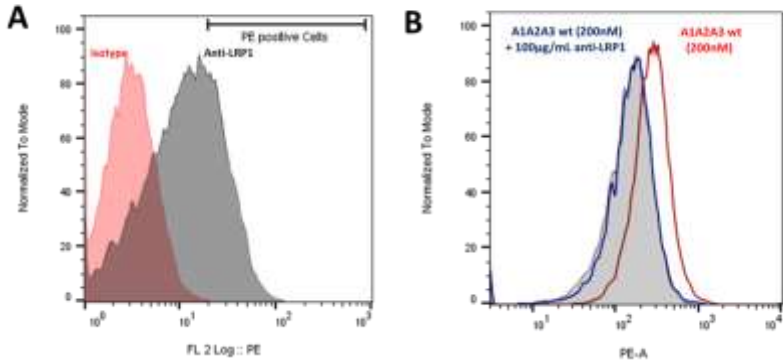

Supplement: NIHMS1639368-supplement-1.pdf [file NIHMS1639368-supplement-1.pdf]
